# Supplementary material for: Monsoon Mission Coupled Forecast System Version 2.0: Model Description and Indian Monsoon Simulations
Source: Copernicus journal article supplement (doi:10.5194/gmd-2023-53), 2023-04-04

main executable is NEMS.exe

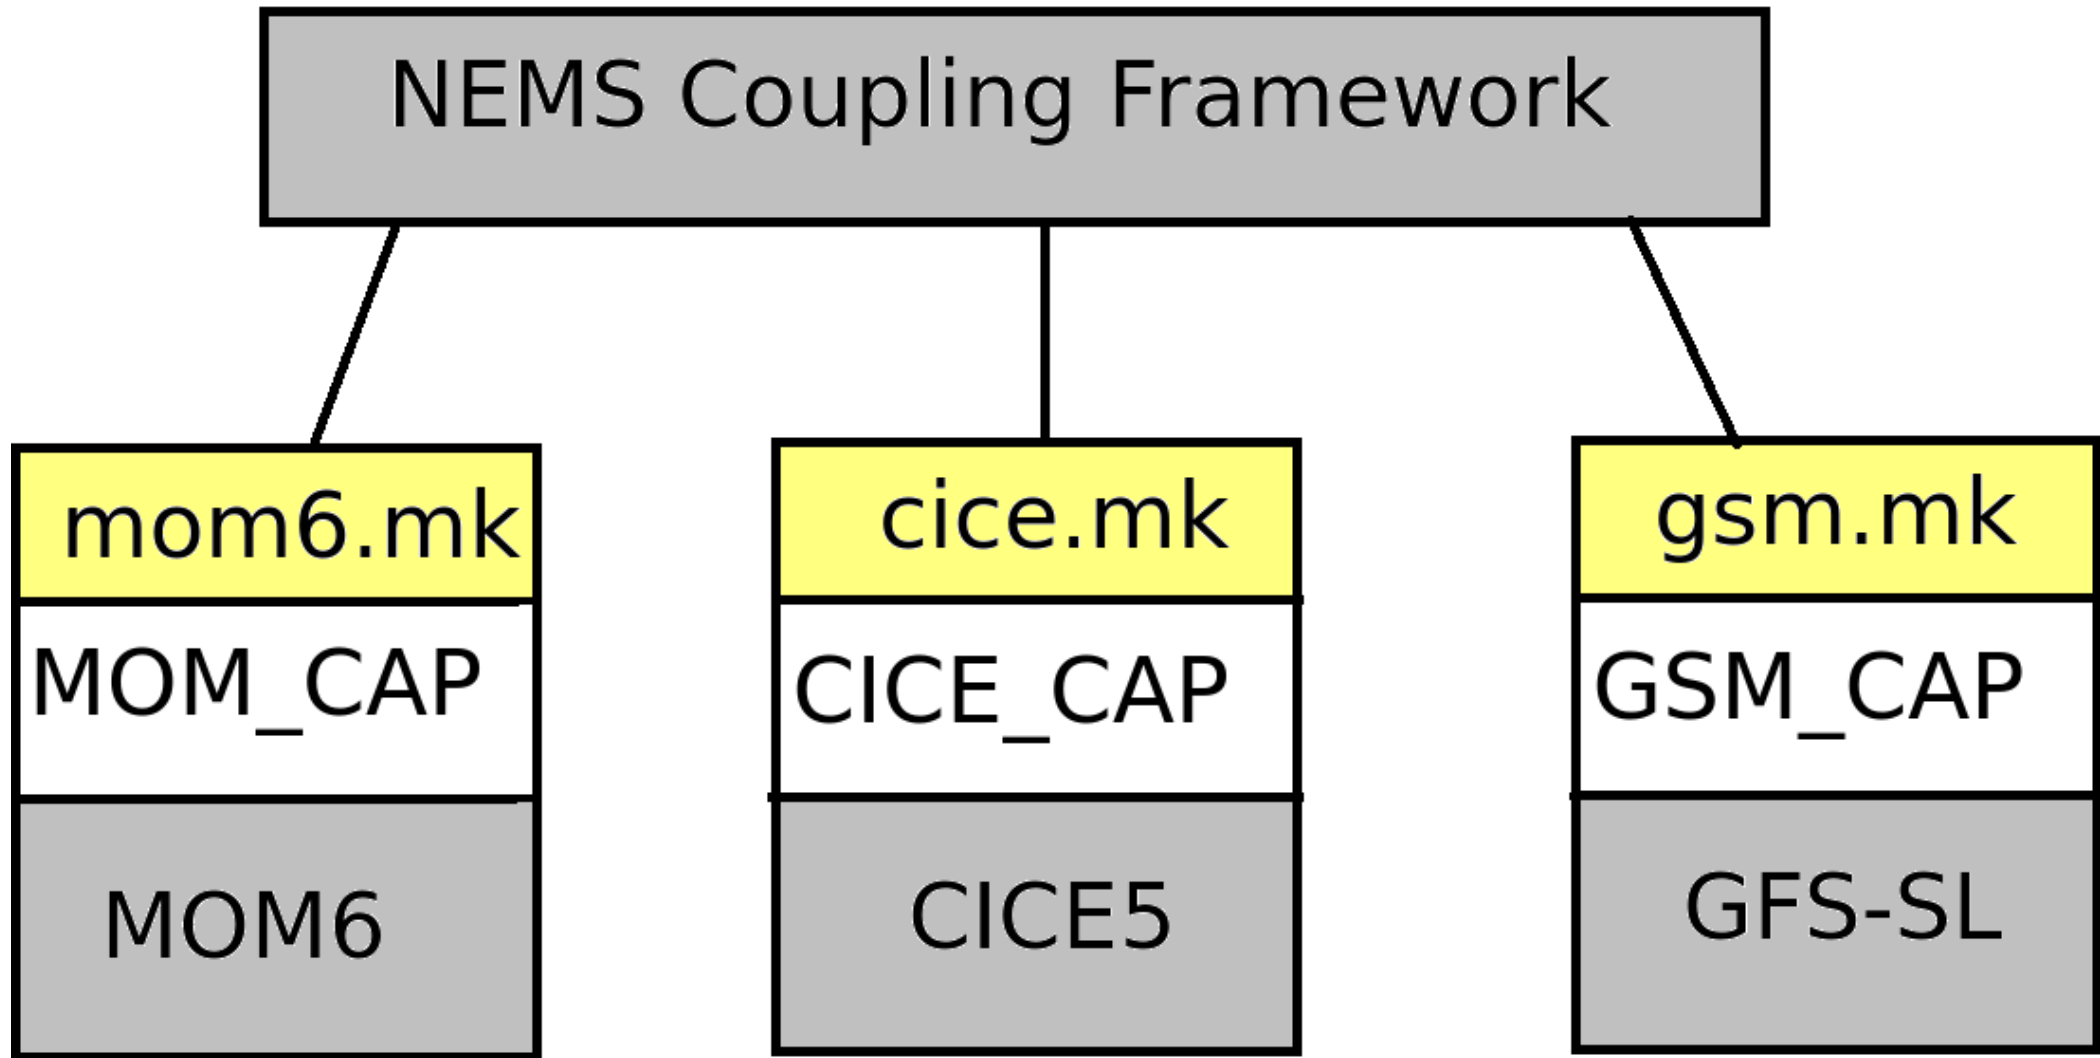

Supplement: Supplementary file [file gmd-2023-53-AC2-supplement.pdf]
